# Supplementary material for: Emerging indoor photovoltaics for self-powered and self-aware IoT towards sustainable energy management
Source: Royal Society of Chemistry journal article supplement (doi:10.1039/d3sc00659j), 2023-01-01
Supplement: d3sc00659j1.pdf [file d3sc00659j1.pdf]

## Supplemental Information

### Emerging Indoor Photovoltaics for Self-Powered and Self-Aware IoT towards Sustainable Energy Management

Hannes Michaels<sup>a,†</sup>, Michael Rinderle<sup>b,†</sup>, Richard Freitag<sup>b,c</sup>, Iacopo Benesperi<sup>a</sup>,  
Alessio Gagliardi<sup>b</sup>, and Marina Freitag<sup>a,\*</sup>

<sup>a</sup> School of Natural and Environmental Science, Bedson Building, Newcastle University, NE1 7RU,  
Newcastle upon Tyne, UK

<sup>b</sup> TUM School of Computation, Information and Technology, Technical University of Munich,  
Hans-Piloty-Straße 1, 85748, Garching, Germany

<sup>c</sup> Swedish University Network (Sunet), Tulegatan 11, 113 53 Stockholm, Sweden

† These authors contributed equally

\* Corresponding author: marina.freitag@newcastle.ac.uk

## Indoor photovoltaic cells and IoT device tests

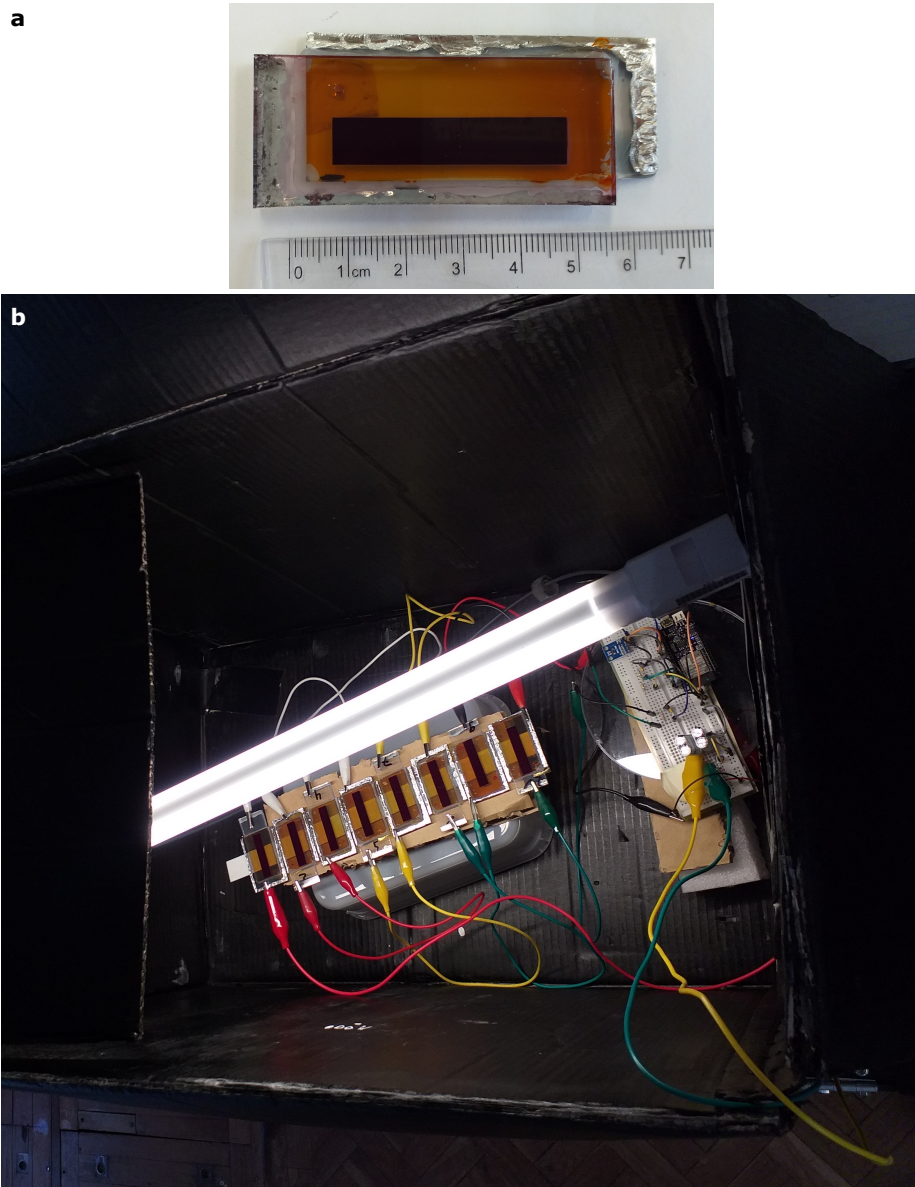

Figure S1: Photographs of **a**, a 3.2 cm<sup>2</sup> XY1:L1-sensitised photovoltaic cell and **b**, a test setup powering a ESP32-FireBeetle-based IoT sensor device with ambient light harvested by photovoltaic cells.

## Osram Warm White 930 fluorescent light tube

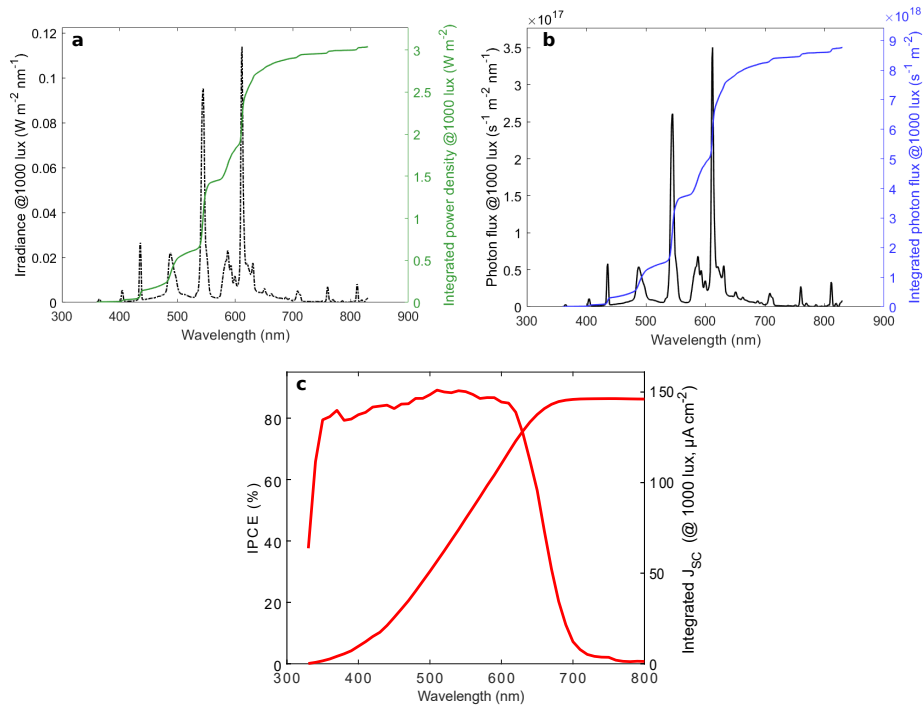

Figure S2: Characterisation of the Osram Warm White 930 fluorescent light tube. **a**, lamp spectrum (in power density) and integrated available power. **b**, emission spectrum (in photon flux) and integrated available photons. **c**, External quantum efficiency spectrum and integrated photocurrent.

## Overview of IoT operation scenarios

Table S1: Deployment scenarios for the wireless IoT devices powered by indoor photovoltaic cells.

| Scenario       | Setting     | Light spectrum                   | Max. lux | Min. lux |
|----------------|-------------|----------------------------------|----------|----------|
| <i>Factory</i> | controlled  | fluorescent tube                 | 1000     | 1000     |
| <i>Office</i>  | controlled  | fluorescent tube                 | 1000     | 0        |
| <i>Home</i>    | fluctuating | fluorescent tube + natural light | ~5000    | 800      |

## Overview of DSC electrolyte compositions

Table S2: Electrolyte compositions in the tested DSCs.

| Description                                               | Redox mediator        | Cu <sup>II</sup> concentration (M) | Lewis base  |
|-----------------------------------------------------------|-----------------------|------------------------------------|-------------|
| Cu(tmby) <sub>2</sub> NMBI 0.1 M Cu <sup>II</sup>         | Cu(tmby) <sub>2</sub> | 0.1                                | NMBI        |
| Cu(tmby) <sub>2</sub> NMBI 0.06 M Cu <sup>II</sup>        | Cu(tmby) <sub>2</sub> | 0.06                               | NMBI        |
| Cu(tmby) <sub>2</sub> NMBI 0.02 M Cu <sup>II</sup>        | Cu(tmby) <sub>2</sub> | 0.02                               | NMBI        |
| Cu(tmby) <sub>2</sub> <i>t</i> BP 0.06 M Cu <sup>II</sup> | Cu(tmby) <sub>2</sub> | 0.06                               | <i>t</i> BP |
| Cu(dmby) <sub>2</sub> NMBI 0.06 M Cu <sup>II</sup>        | Cu(dmby) <sub>2</sub> | 0.06                               | NMBI        |

Cu(tmby)<sub>2</sub>: bis-(4,4',6,6'-tetramethyl-2,2'-bipyridine)copper(II/I) bis(trifluoromethanesulfonyl)imide

Cu(dmby)<sub>2</sub>: bis-(6,6'-dimethyl-2,2'-bipyridine)copper(II/I) bis(trifluoromethanesulfonyl)imide

NMBI: *N*-methyl benzimidazole

*t*BP: *tert*-butyl pyridine

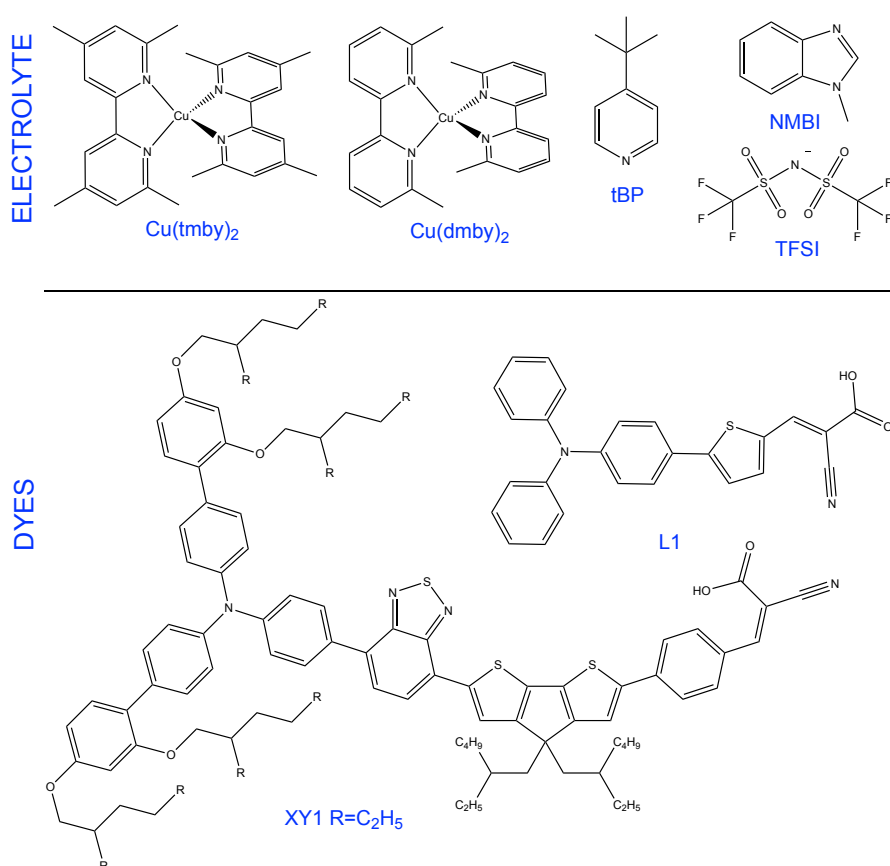

Figure S3: Chemical structures of coordination complexes, counter ions, organic dyes and Lewis bases used in the DSCs.

## Characterisation of photovoltaic cells under one-sun AM1.5G.

Table S3: Performance metrics of XY1:L1-sensitised photovoltaic cells under one-sun AM1.5G irradiation, by electrolyte composition.

|                                                           | Voc (V)         | Jsc ( $\mu\text{A cm}^{-2}$ ) | FF                | PCE (%)         |
|-----------------------------------------------------------|-----------------|-------------------------------|-------------------|-----------------|
| Cu(tmby) <sub>2</sub> NMBI 0.1 M Cu <sup>II</sup>         | 1.04            | 13.6                          | 0.750             | 10.4            |
|                                                           | 1.04 $\pm$ 0.02 | 13.2 $\pm$ 0.45               | 0.739 $\pm$ 0.013 | 10.1 $\pm$ 0.23 |
| Cu(tmby) <sub>2</sub> NMBI 0.06 M Cu <sup>II</sup>        | 1.07            | 12.7                          | 0.705             | 9.47            |
|                                                           | 1.06 $\pm$ 0.02 | 12.2 $\pm$ 0.47               | 0.708 $\pm$ 0.012 | 9.17 $\pm$ 0.30 |
| Cu(tmby) <sub>2</sub> NMBI 0.02 M Cu <sup>II</sup>        | 1.00            | 12.4                          | 0.640             | 7.94            |
|                                                           | 1.02 $\pm$ 0.02 | 12.0 $\pm$ 0.41               | 0.609 $\pm$ 0.024 | 7.47 $\pm$ 0.28 |
| Cu(tmby) <sub>2</sub> <i>t</i> BP 0.06 M Cu <sup>II</sup> | 1.07            | 12.6                          | 0.770             | 10.4            |
|                                                           | 1.05 $\pm$ 0.02 | 12.3 $\pm$ 0.31               | 0.769 $\pm$ 0.008 | 10.0 $\pm$ 0.31 |
| Cu(dmby) <sub>2</sub> NMBI 0.06 M Cu <sup>II</sup>        | 1.03            | 12.1                          | 0.685             | 8.56            |
|                                                           | 1.04 $\pm$ 0.02 | 12.2 $\pm$ 0.27               | 0.657 $\pm$ 0.017 | 8.37 $\pm$ 0.23 |

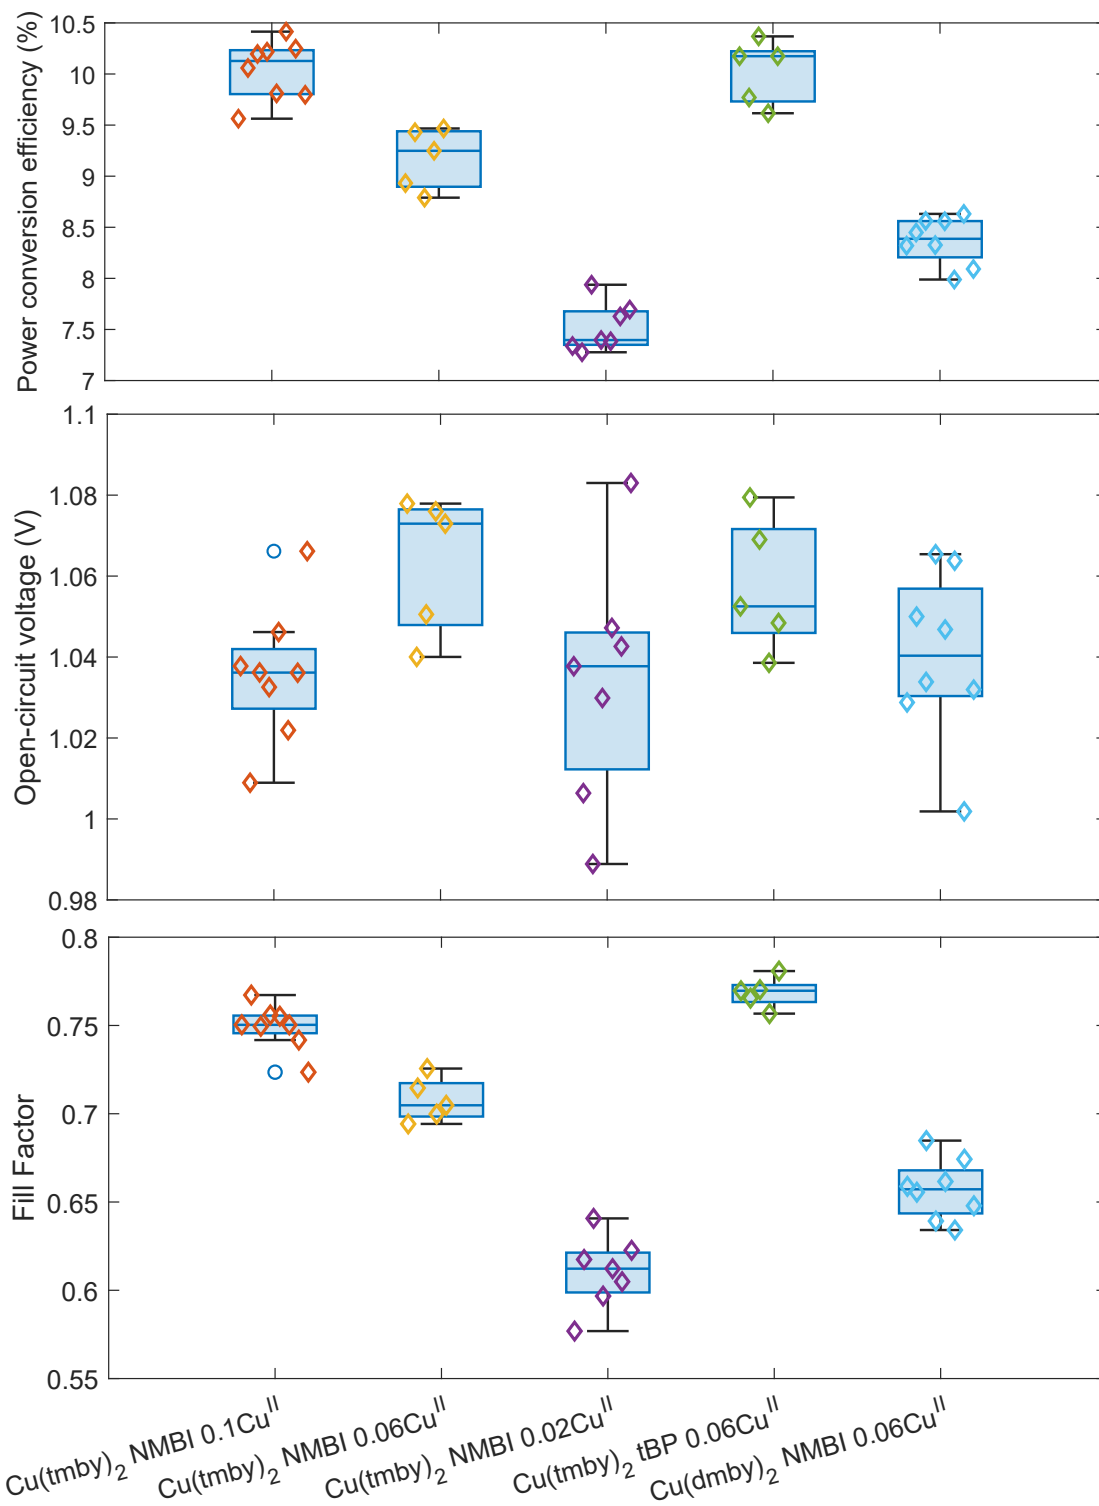

Figure S4: Performance metrics of XY1:L1-sensitised photovoltaic cells under one-sun AM1.5G irradiation, by electrolyte composition.

## Characterisation of photovoltaic cells under 0.5 sun irradiation.

Table S4: Performance metrics of XY1:L1-sensitised photovoltaic cells under 0.5 sun irradiation, by electrolyte composition.

|                                                           | Voc (V)         | Jsc ( $\mu\text{A cm}^{-2}$ ) | FF                | PCE (%)         |
|-----------------------------------------------------------|-----------------|-------------------------------|-------------------|-----------------|
| Cu(tmby) <sub>2</sub> NMBI 0.1 M Cu <sup>II</sup>         | 1.00            | 6.91                          | 0.773             | 10.6            |
|                                                           | 1.00 $\pm$ 0.01 | 6.64 $\pm$ 0.28               | 0.777 $\pm$ 0.005 | 10.3 $\pm$ 0.26 |
| Cu(tmby) <sub>2</sub> NMBI 0.06 M Cu <sup>II</sup>        | 1.02            | 6.80                          | 0.754             | 10.5            |
|                                                           | 1.03 $\pm$ 0.01 | 6.67 $\pm$ 0.11               | 0.740 $\pm$ 0.012 | 10.2 $\pm$ 0.29 |
| Cu(tmby) <sub>2</sub> NMBI 0.02 M Cu <sup>II</sup>        | 1.03            | 6.18                          | 0.639             | 8.15            |
|                                                           | 1.04 $\pm$ 0.02 | 6.04 $\pm$ 0.21               | 0.645 $\pm$ 0.008 | 8.14 $\pm$ 0.10 |
| Cu(tmby) <sub>2</sub> <i>t</i> BP 0.06 M Cu <sup>II</sup> | 1.01            | 6.83                          | 0.790             | 10.9            |
|                                                           | 1.01 $\pm$ 0.01 | 6.63 $\pm$ 0.18               | 0.800 $\pm$ 0.010 | 10.7 $\pm$ 0.18 |
| Cu(dmby) <sub>2</sub> NMBI 0.06 M Cu <sup>II</sup>        | 1.00            | 6.65                          | 0.731             | 9.61            |
|                                                           | 1.01 $\pm$ 0.02 | 6.53 $\pm$ 0.18               | 0.719 $\pm$ 0.017 | 9.51 $\pm$ 0.12 |

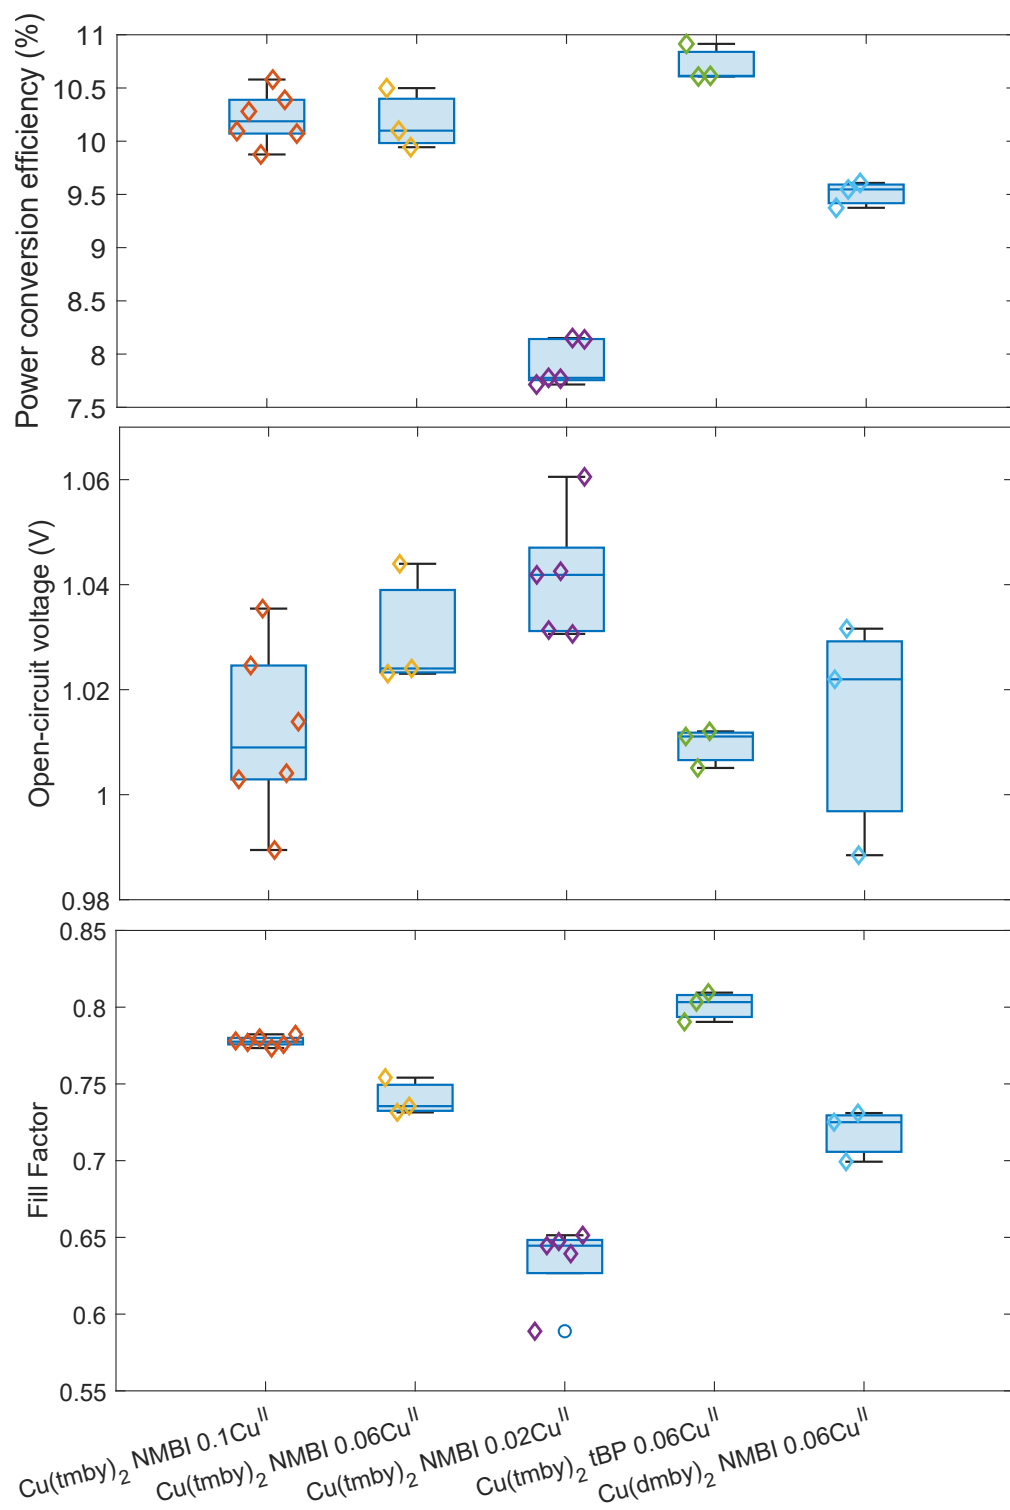

Figure S5: Performance metrics of XY1:L1-sensitised photovoltaic cells under 0.5 sun irradiation, by electrolyte composition.



## Characterisation of photovoltaic cells under 0.14 sun irradiation.

Table S5: Performance metrics of XY1:L1-sensitised photovoltaic cells under 0.14 sun irradiation, by electrolyte composition.

|                                                    | Voc (V)       | Jsc ( $\mu\text{A cm}^{-2}$ ) | FF            | PCE (%)      |
|----------------------------------------------------|---------------|-------------------------------|---------------|--------------|
| Cu(tmby) <sub>2</sub> NMBI 0.1 M Cu <sup>II</sup>  | 0.985         | 1.89                          | 0.802         | 10.5         |
|                                                    | 0.966 ± 0.011 | 1.88 ± 0.01                   | 0.794 ± 0.007 | 10.1 ± 0.26  |
| Cu(tmby) <sub>2</sub> NMBI 0.06 M Cu <sup>II</sup> | 1.00          | 1.93                          | 0.780         | 10.8         |
|                                                    | 0.999 ± 0.007 | 1.92 ± 0.02                   | 0.776 ± 0.007 | 10.6 ± 0.20  |
| Cu(tmby) <sub>2</sub> NMBI 0.02 M Cu <sup>II</sup> | 0.986         | 1.92                          | 0.740         | 9.70         |
|                                                    | 0.986 ± 0.024 | 1.82 ± 0.06                   | 0.698 ± 0.030 | 8.95 ± 0.58  |
| Cu(tmby) <sub>2</sub> tBP 0.06 M Cu <sup>II</sup>  | 0.975         | 1.92                          | 0.790         | 10.6         |
|                                                    | 0.975 ± 0.004 | 1.91 ± 0.01                   | 0.794 ± 0.011 | 10.4 ± 0.29  |
| Cu(dmby) <sub>2</sub> NMBI 0.06 M Cu <sup>II</sup> | 0.950         | 1.94                          | 0.755         | 10.1         |
|                                                    | 0.973 ± 0.021 | 1.82 ± 0.10                   | 0.755 ± 0.009 | 9.55 ± 0.656 |

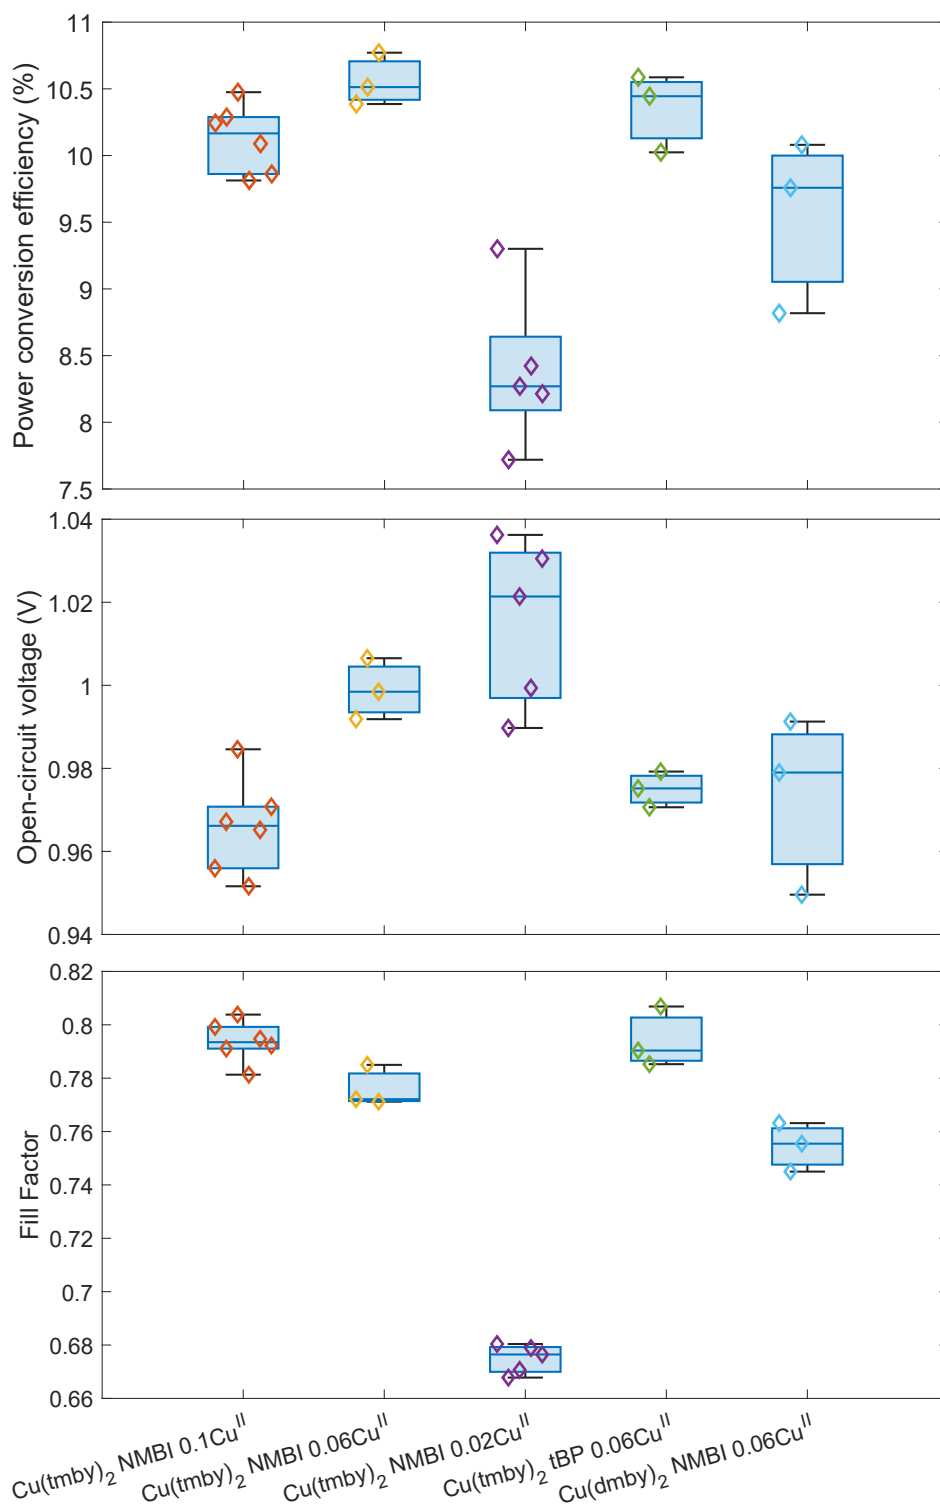

Figure S6: Performance metrics of XY1:L1-sensitised photovoltaic cells under 0.14 sun irradiation, by electrolyte composition.

## Characterisation of photovoltaic cells under ambient light.

Table S6: Performance metrics of XY1:L1-sensitised photovoltaic cells at 1000 lux ambient illumination (fluorescent lamp), by electrolyte composition.

|                                                           | Voc (V)           | Jsc ( $\mu\text{A cm}^{-2}$ ) | FF                | PCE (%)         |
|-----------------------------------------------------------|-------------------|-------------------------------|-------------------|-----------------|
| Cu(tmby) <sub>2</sub> NMBI 0.1 M Cu <sup>II</sup>         | 0.916             | 147                           | 0.808             | 36.0            |
|                                                           | 0.915 $\pm$ 0.006 | -from IPCE-                   | 0.801 $\pm$ 0.008 | 35.7 $\pm$ 0.34 |
| Cu(tmby) <sub>2</sub> NMBI 0.06 M Cu <sup>II</sup>        | 0.995             | 147                           | 0.778             | 37.5            |
|                                                           | 0.974 $\pm$ 0.014 | -from IPCE-                   | 0.790 $\pm$ 0.002 | 36.9 $\pm$ 0.47 |
| Cu(tmby) <sub>2</sub> NMBI 0.02 M Cu <sup>II</sup>        | 1.00              | 145                           | 0.726             | 35.1            |
|                                                           | 1.00 $\pm$ 0.02   | 145 $\pm$ 1                   | 0.730 $\pm$ 0.004 | 34.8 $\pm$ 0.60 |
| Cu(tmby) <sub>2</sub> <i>t</i> BP 0.06 M Cu <sup>II</sup> | 0.952             | 147                           | 0.782             | 36.0            |
|                                                           | 0.953 $\pm$ 0.006 | -from IPCE-                   | 0.780 $\pm$ 0.009 | 35.6 $\pm$ 0.39 |
| Cu(dmby) <sub>2</sub> NMBI 0.06 M Cu <sup>II</sup>        | 0.970             | 139                           | 0.769             | 34.1            |
|                                                           | 0.945 $\pm$ 0.035 | 138 $\pm$ 1                   | 0.777 $\pm$ 0.019 | 33.5 $\pm$ 0.66 |

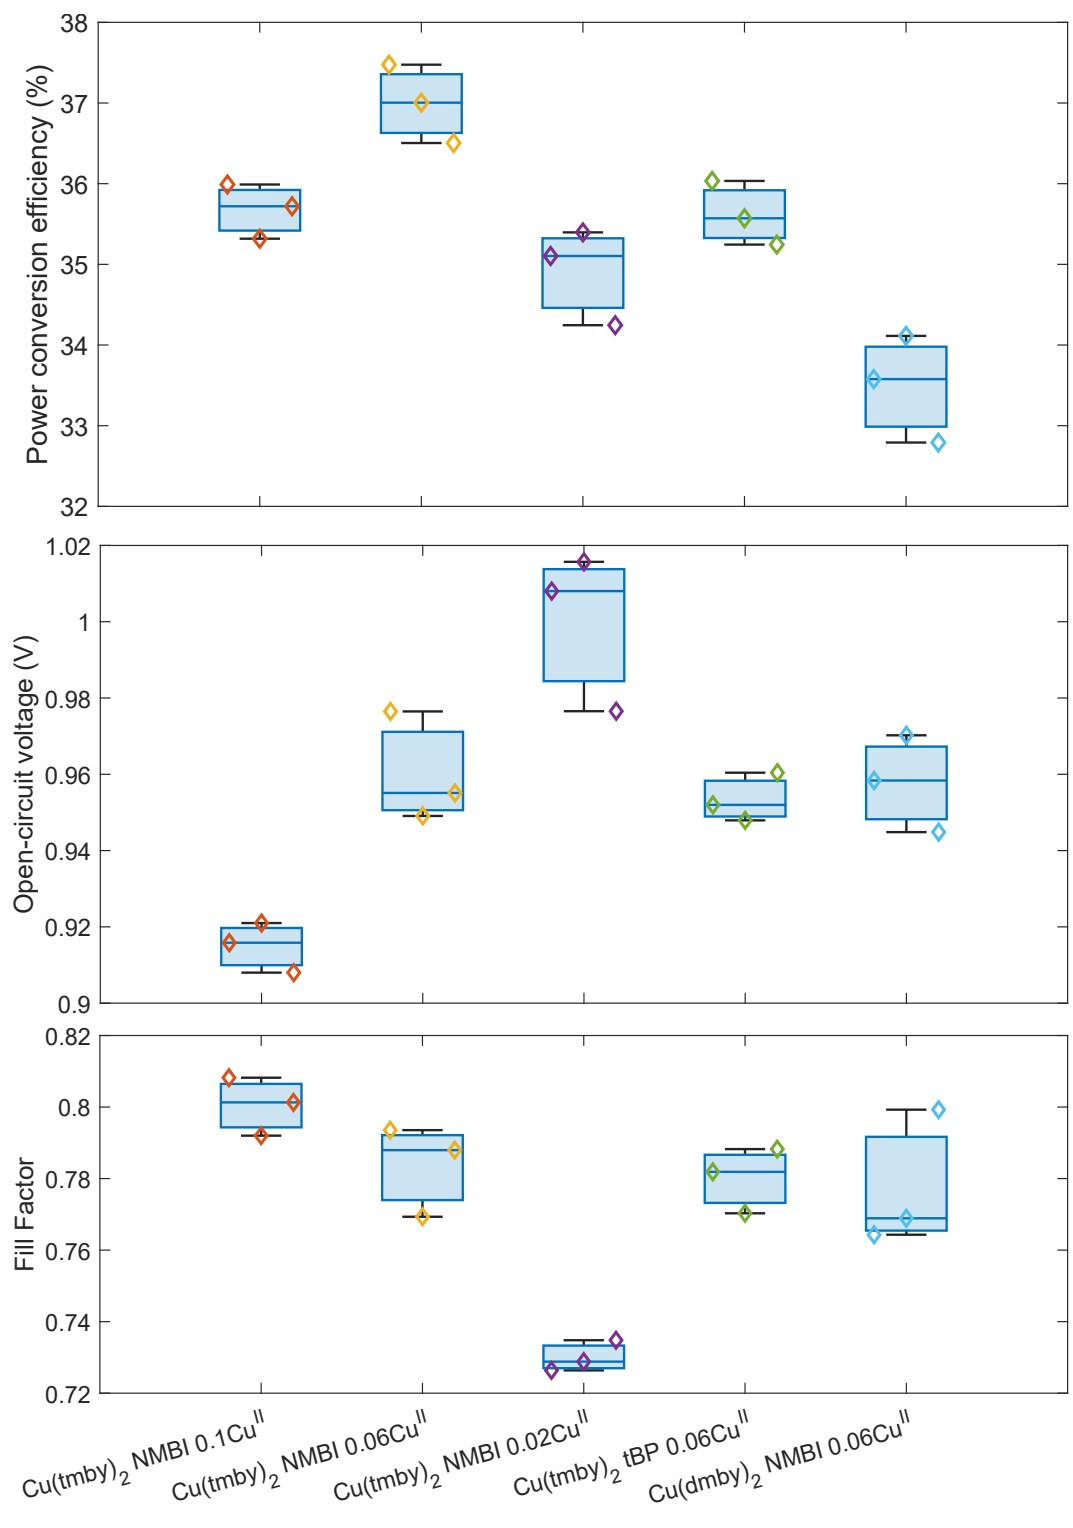

Figure S7: Performance metrics of XY1:L1-sensitised photovoltaic cells at 1000 lux ambient illumination (fluorescent lamp), by electrolyte composition.

## Observations on current-voltage hysteresis.

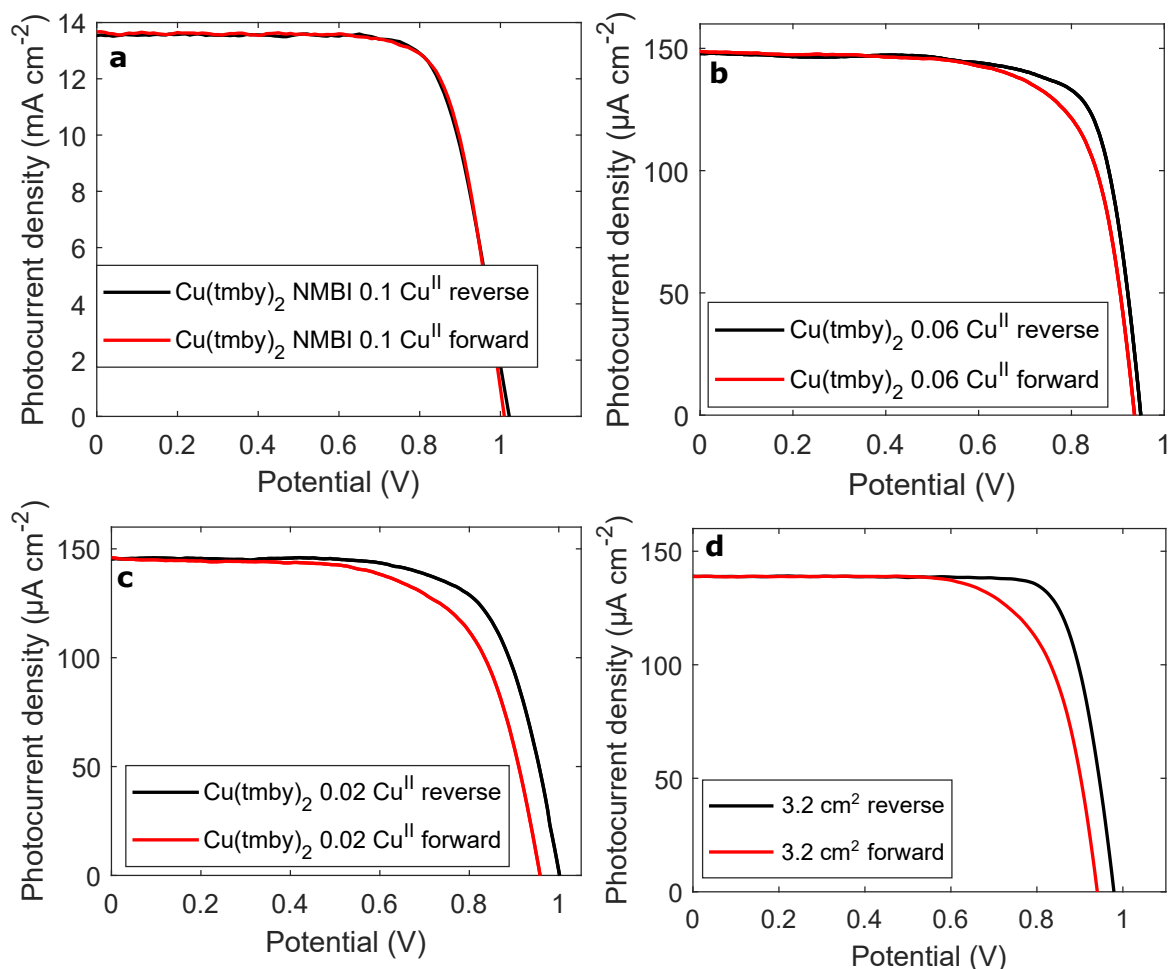

Figure S8: Current-voltage hysteresis of XY1:L1-sensitised photovoltaic cells, by electrolyte composition. **a**, 0.384 cm<sup>2</sup> cell comprising 0.1 M Cu<sup>II</sup> at one sun. **b**, 0.384 cm<sup>2</sup> cell comprising 0.06 M and **c**, 0.02 M Cu<sup>II</sup> at 1000 lux ambient light (fluorescent lamp). **d**, 3.2 cm<sup>2</sup> cell (comprising 0.06 M Cu<sup>II</sup>) at 1000 lux. Performance metrics are listed in Tabs. S7-S10.

Table S7: Performance metrics of a 0.384 cm<sup>2</sup> cell comprising 0.1 M Cu<sup>II</sup> at one-sun;  $HI = 0$ .

|         | Voc (V) | Jsc (μA cm <sup>-2</sup> ) | FF    | PCE (%) |
|---------|---------|----------------------------|-------|---------|
| reverse | 1.02    | 13.6                       | 0.750 | 10.4    |
| forward | 1.01    | 13.7                       | 0.751 | 10.4    |

Table S8: Performance metrics of a  $0.384\text{ cm}^2$  cell comprising  $0.06\text{ M Cu}^{\text{II}}$  at 1000 lux indoor illumination;  $HI = 0.031$ .

|         | Voc (V) | Jsc ( $\mu\text{A cm}^{-2}$ ) | FF    | PCE (%) |
|---------|---------|-------------------------------|-------|---------|
| reverse | 0.955   | 147                           | 0.788 | 36.3    |
| forward | 0.945   | 147                           | 0.713 | 34.1    |

Table S9: Performance metrics of a  $0.384\text{ cm}^2$  cell comprising  $0.02\text{ M Cu}^{\text{II}}$  at 1000 lux indoor illumination;  $HI = 0.060$ .

|         | Voc (V) | Jsc ( $\mu\text{A cm}^{-2}$ ) | FF    | PCE (%) |
|---------|---------|-------------------------------|-------|---------|
| reverse | 1.00    | 145                           | 0.726 | 35.1    |
| forward | 0.962   | 145                           | 0.678 | 31.1    |

Table S10: Performance metrics of a  $3.2\text{ cm}^2$  cell comprising  $0.06\text{ M Cu}^{\text{II}}$  at 1000 lux indoor illumination;  $HI = 0.092$

|         | Voc (V) | Jsc ( $\mu\text{A cm}^{-2}$ ) | FF    | PCE (%) |
|---------|---------|-------------------------------|-------|---------|
| reverse | 0.984   | 139                           | 0.821 | 37.1    |
| forward | 0.948   | 139                           | 0.688 | 30.8    |

## Characterisation under ambient light

Table S11: Performance metrics of a 3.2 cm<sup>2</sup> cell comprising 0.06 M Cu<sup>II</sup>, by illumination intensity.

|          | Voc (V) | Jsc ( $\mu\text{A cm}^{-2}$ ) | FF    | PCE (%) |
|----------|---------|-------------------------------|-------|---------|
| 1000 lux | 0.984   | 139                           | 0.821 | 37.1    |
| 500 lux  | 0.950   | 69.7                          | 0.800 | 34.8    |
| 200 lux  | 0.919   | 27.6                          | 0.812 | 33.7    |

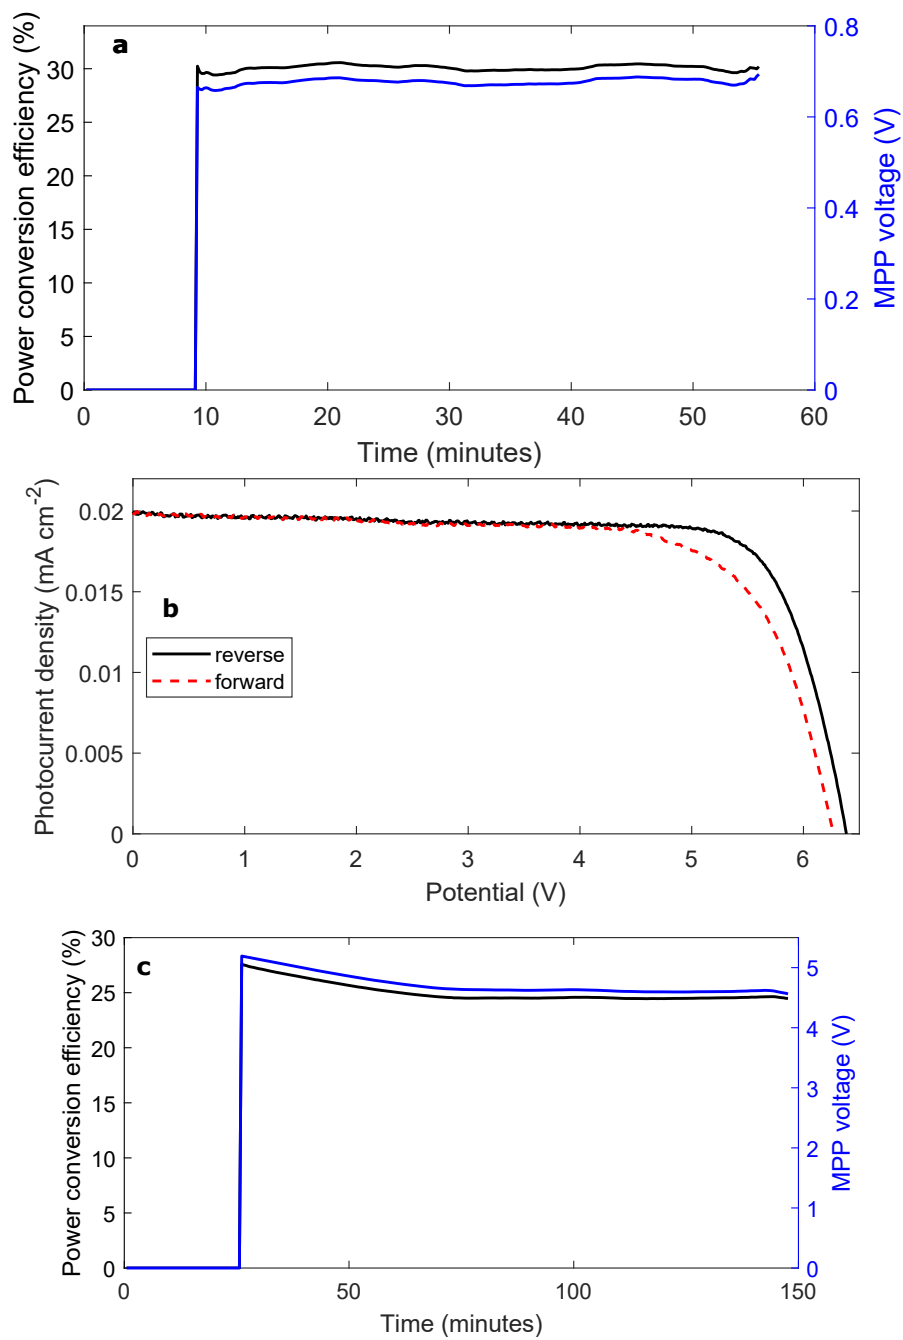

Figure S9: **a**, MPP tracking of 3.2 cm<sup>2</sup> cell at 1000 lux illumination; stabilised PCE 30.3%,  $V_{MPP}$  0.678 V. **b**,  $J - V$  sweep (Performance metrics in Tab. S12) and **c**, maximum power point tracking of an array of seven 3.2 cm<sup>2</sup> cells (total area 22.4 cm<sup>2</sup>), stabilised PCE 27.5%,  $V_{MPP}$  4.62 V.



Table S12: Performance metrics of an array of seven 3.2 cm<sup>2</sup> cells (total area 22.4 cm<sup>2</sup>); corresponding to Fig. S9.

|         | Voc (V) | Jsc ( $\mu\text{A cm}^{-2}$ ) | FF    | PCE (%) |
|---------|---------|-------------------------------|-------|---------|
| reverse | 6.385   | 20                            | 0.772 | 32.5    |
| forward | 6.267   | 20                            | 0.708 | 29.1    |

## Transient photovoltage

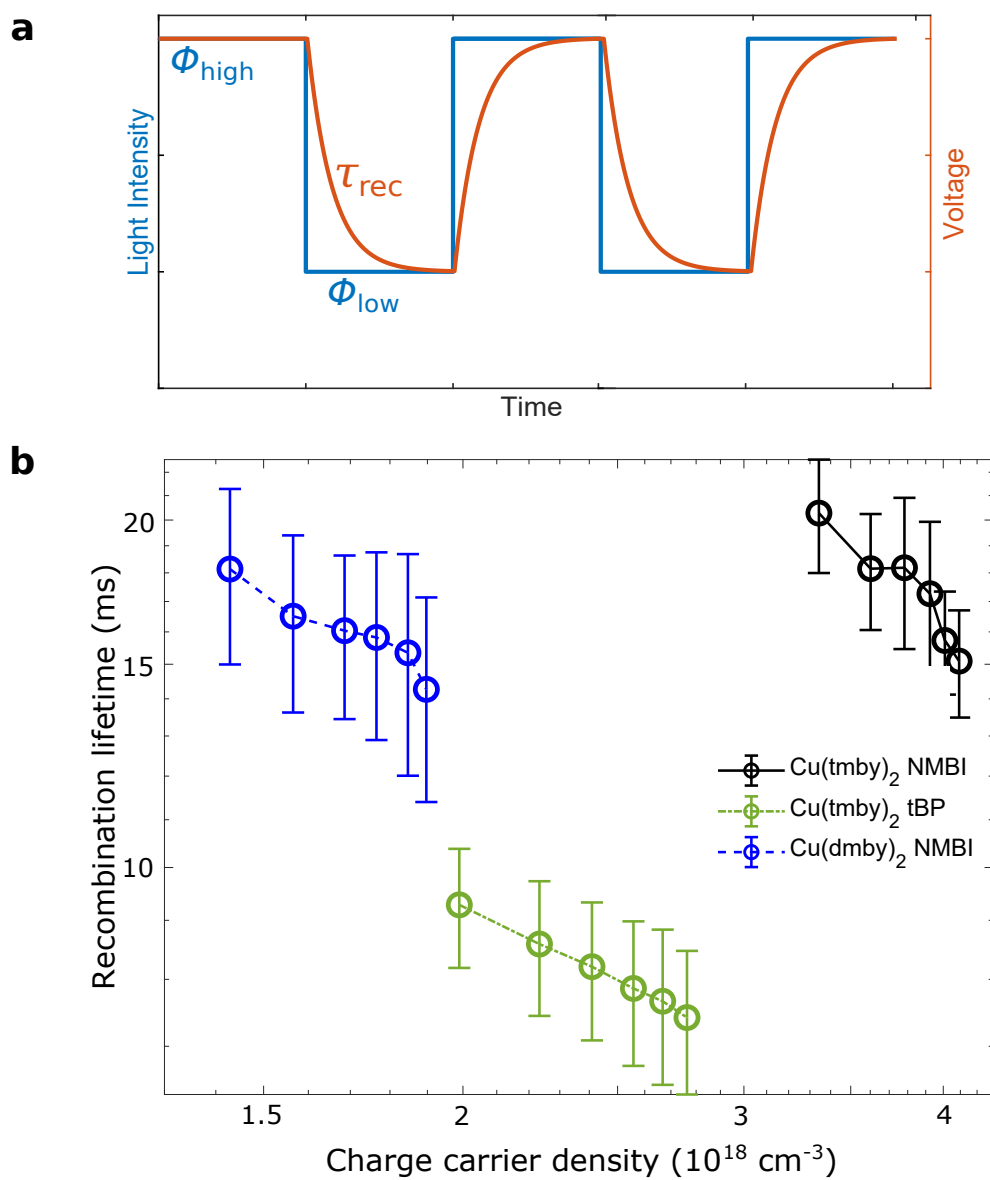

Figure S10: Electron recombination lifetime probed by transient photovoltage.

## Sensitiser regeneration

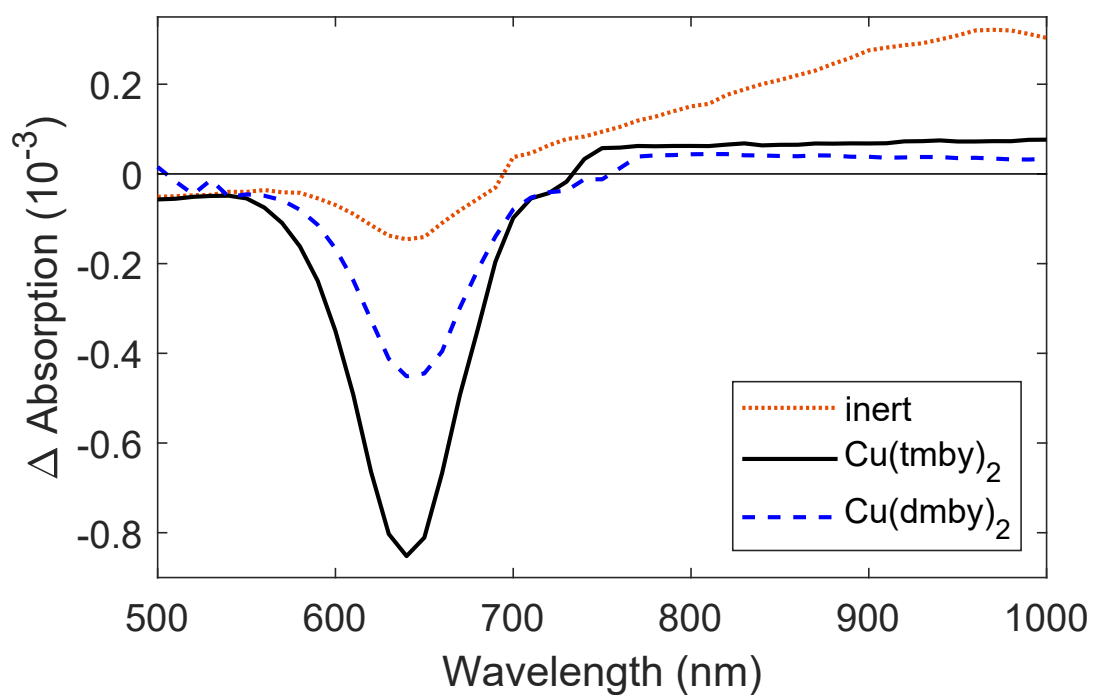

Figure S11: Sensitiser regeneration probed by photoinduced absorption spectroscopy. The XY1 dye is regenerated rapidly by both the  $\text{Cu}(\text{tmby})_2$  and  $\text{Cu}(\text{dmby})_2$  redox mediator.

## Ambient-Light-powered electronic devices

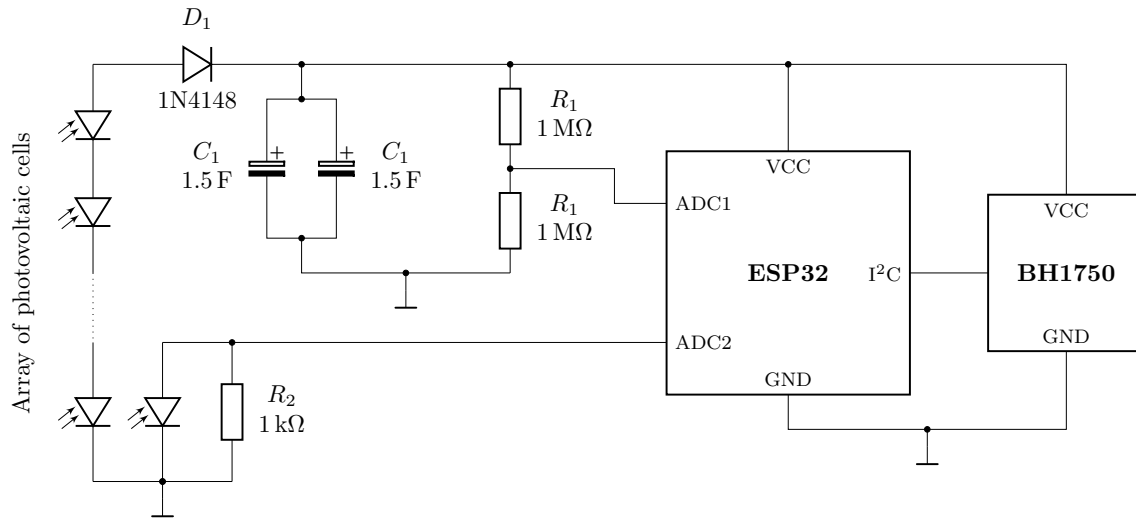

Figure S12: Schematic of the energy harvesting sensor system based on the FireBeetle ESP32 microcontroller. The system is powered by an array of photovoltaic cells. To buffer energy for dark times, two supercapacitors  $C_1$  are used. Diode  $D_1$  prevents the supercapacitors from discharging through the photovoltaic cells. A voltage divider made of the two resistors  $R_1$  is used to measure the capacitor voltage and prevents the ADC1 pin from voltages above 3.3 V. The cell current is measured on an additional photovoltaic cell in parallel to the supply array. The lux sensor BH1750 is connected to the microcontroller via the I<sup>2</sup>C-bus.

## Pseudocode

```

1: setup // Initial microcontroller setup
2:   Configure ADC
3:   Configure BH1750 lux meter
4:   if first boot then
5:     establish WiFi connection
6:     Synchronize clock via NTP
7:     disconnect WiFi
8:   end if
9: end setup
10:
11: loop // Start microcontroller loop
12:    $V_c \leftarrow$  Cap voltage measurement from ADC1
13:   if  $V_c < 2.9$  then
14:     goto deep sleep
15:   end if
16:    $I_c \leftarrow$  Cell current measurement from ADC2

```

```

17:   $l_x \leftarrow$  Illumination measurement from BH1750
18:   $t \leftarrow$  Timestamp
19:  scenario  $\leftarrow$  LSTM_PREDICTION( $l_x$ )
20:  advance measurement counter
21:
22:  if persistent buffer not full then
23:      append measurement to buffer
24:  else
25:      if  $V_c < 3.3$  then                                     // Voltage too low to safely start WiFi
26:          store persistent buffer in flash memory
27:          clear persistent buffer
28:      else                                                     // Voltage high enough for WiFi
29:          establish WiFi connection
30:          send measurements from flash memory via TCP
31:          send measurements from persistent buffer via TCP
32:          disconnect WiFi
33:          clear flash memory
34:          clear persistent buffer
35:      end if
36:  end if
37:
38:  if scenario is 0 then                                       // Run scenario dependent workload
39:      run office workload
40:  else if scenario is 1 then
41:      run factory workload
42:  else if scenario is 2 then
43:      run home workload
44:  else
45:      no prediction available
46:  end if
47:  goto sleep
48: end loop

```

## Data time series from light-powered ESP32 sensor devices

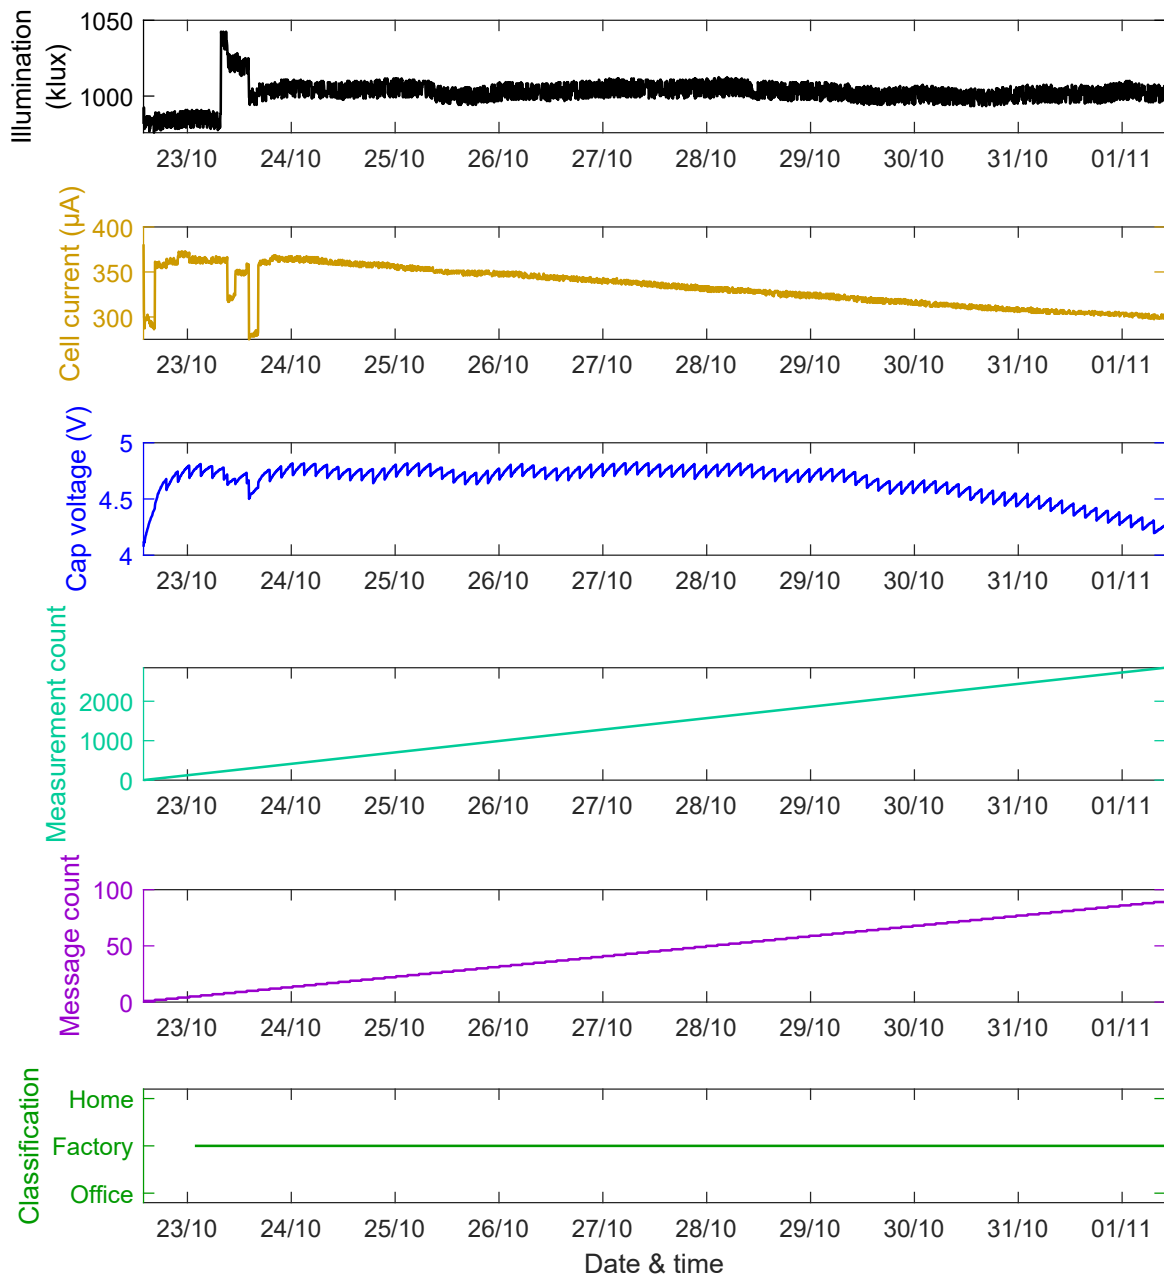

Figure S13: Time series data from a ESP32 FireBeetle microcontroller, powered an array of seven  $3.2\text{ cm}^2$  cells (total area  $22.4\text{ cm}^2$ ), in the *factory* setting. The recorded data include illumination, cell photocurrent, capacitor voltage, number of measurements, number of transmitted packages, as well as the categorisation of the deployment scenario based on the pre-trained artificial neural network.

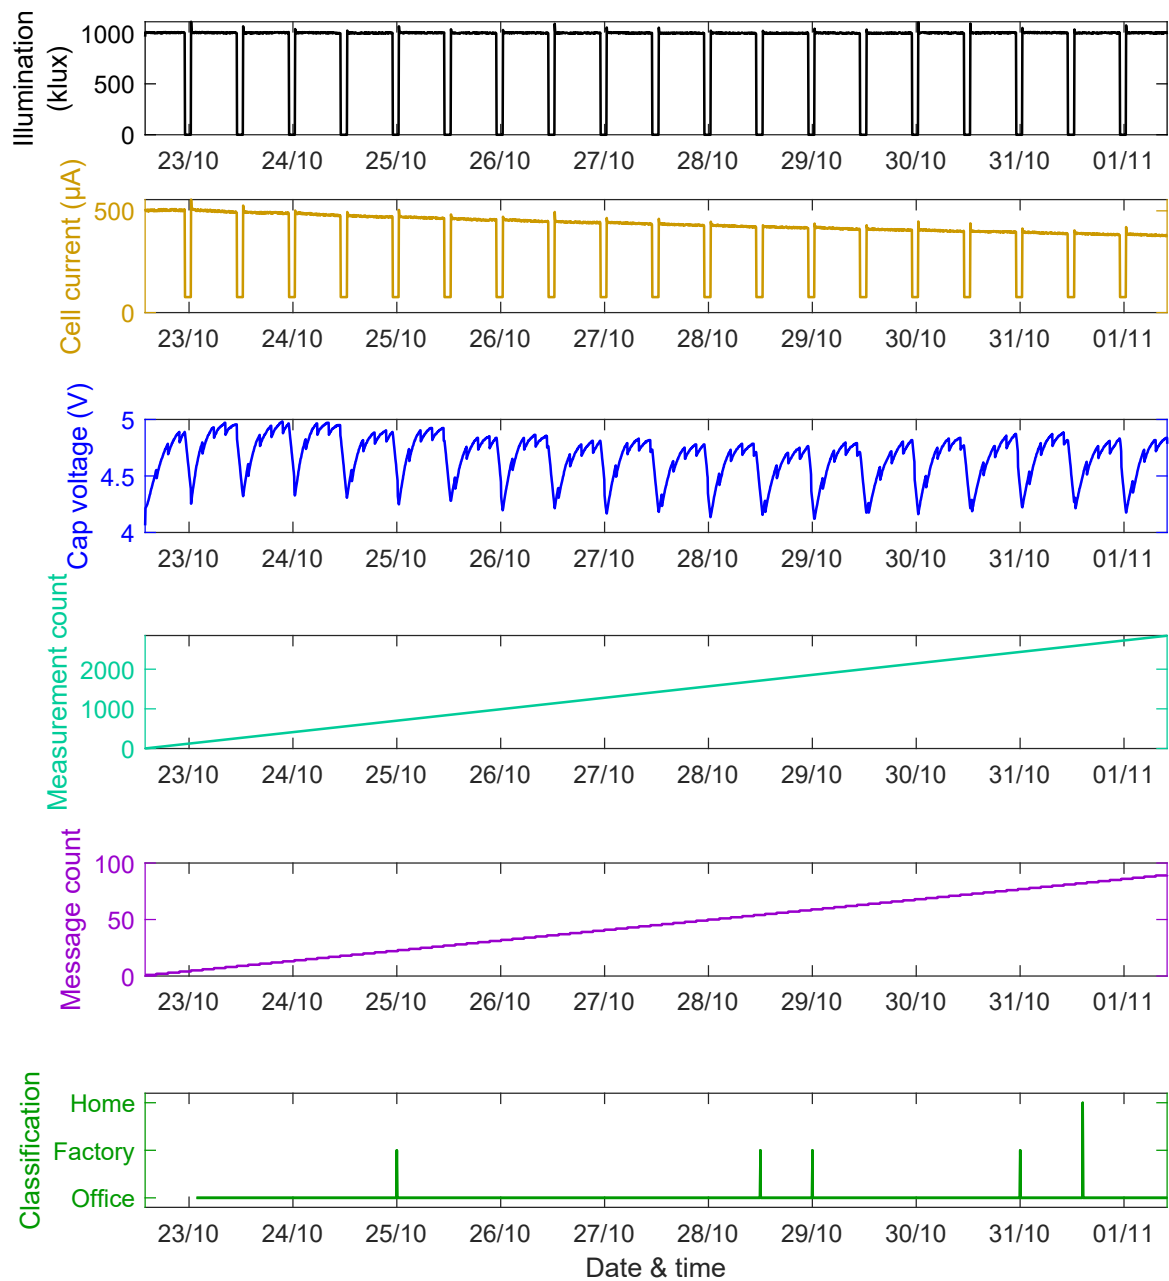

Figure S14: Time series data from a ESP32 FireBeetle microcontroller, powered an array of seven  $3.2\text{ cm}^2$  cells (total area  $22.4\text{ cm}^2$ ), in the *office* setting. The recorded data include illumination, cell photocurrent, capacitor voltage, number of measurements, number of transmitted packages, as well as the categorisation of the deployment scenario based on the pre-trained artificial neural network.

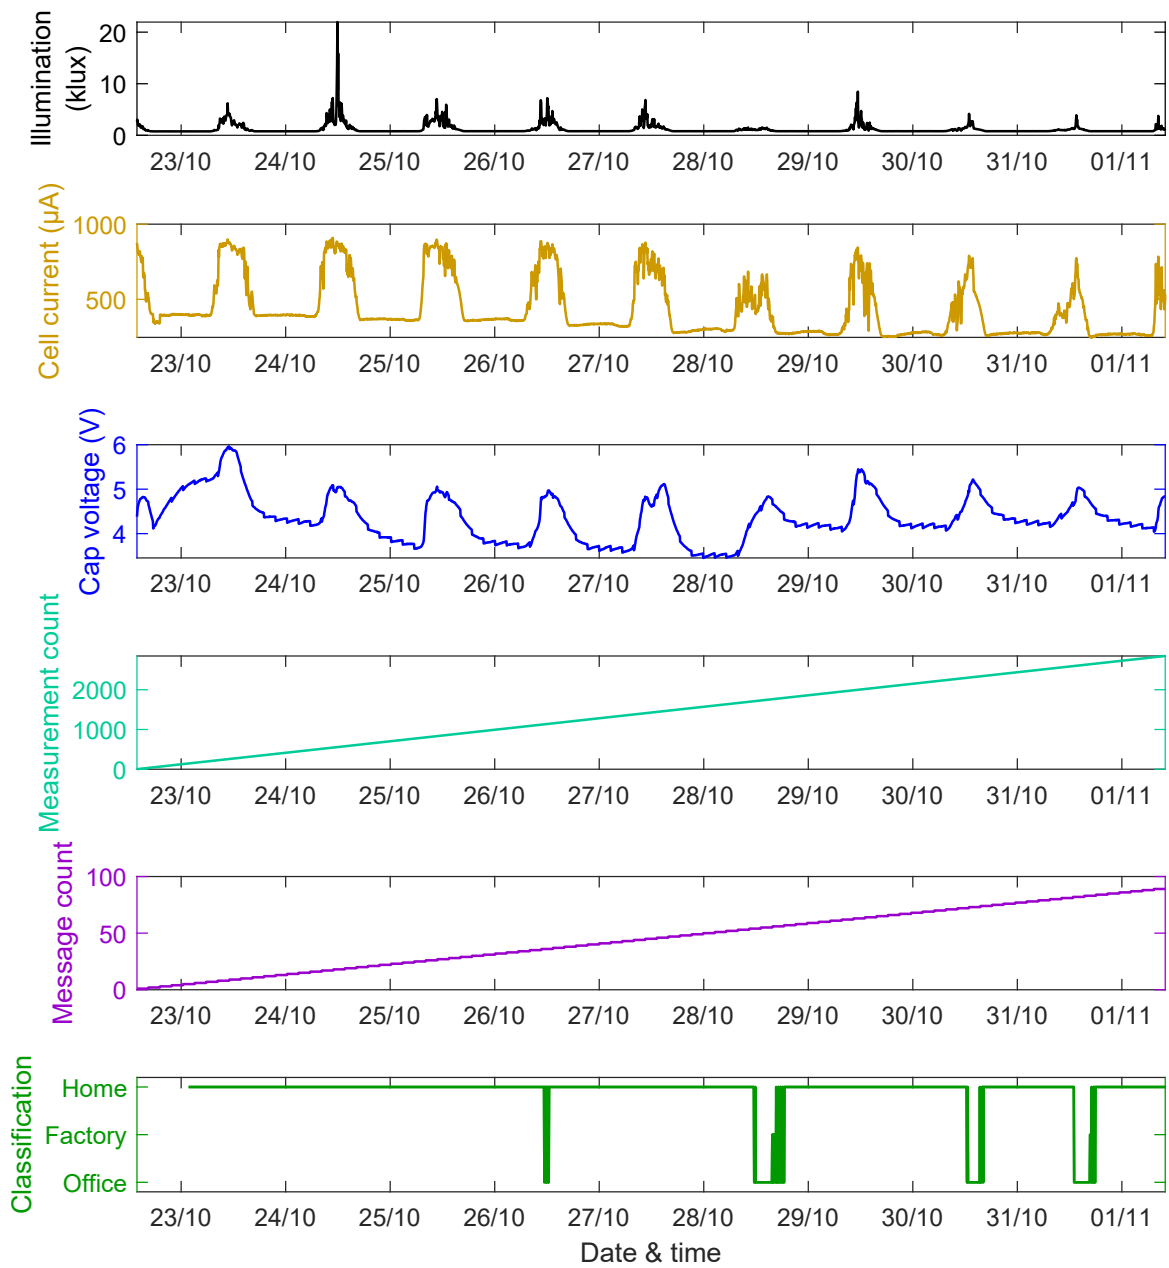

Figure S15: Time series data from a ESP32 FireBeetle microcontroller, powered an array of seven  $3.2 \text{ cm}^2$  cells (total area  $22.4 \text{ cm}^2$ ), in the *home* setting. The recorded data include illumination, cell photocurrent, capacitor voltage, number of measurements, number of transmitted packages, as well as the categorisation of the deployment scenario based on the pre-trained artificial neural network.
